# Supplementary material for: Selection on Expected Maximum Haploid Breeding Values Can Increase Genetic Gain in Recurrent Genomic Selection
Source: PubMed Central journal article supplement (PMC5873908; doi:10.1534/g3.118.200091), 2018-02-06
Supplement: 1173FileS1.pdf [file 1173FileS1.pdf]

# Selection on expected maximum haploid breeding values can increase genetic gain in recurrent genomic selection

Dominik Müller\*· Pascal Schopp\* and Albrecht E. Melchinger\*

\*Institute of Plant Breeding, Seed Sciences and Population Genetics, University of Hohenheim, 70599 Stuttgart, Germany

January 28<sup>th</sup>, 2018

Correspondence: melchinger@uni-hohenheim.de

## Supplemental File 1

### Optimal number of haplotypes for OHV

The optimal number of haplotypes  $N_S$  per chromosome for selection criterion OHV that maximized  $R_{OHV}$  in selection cycle 50 primarily depended on  $N_{chr}$  (Figure S1-3). For  $N_{chr} = 5$  the optimal  $N_S$  ranged between 8 and 16. For  $N_{chr} = 20$ , it ranged between 2 and 4, and for  $N_{chr} = 40$  between 1 and 2. Given the chromosomes lengths for these values of  $N_{chr}$  (400, 100 and 50 cM, respectively), the results indicate that the optimal haplotype length for criterion OHV that maximized long-term genetic gain after 50 cycles of selection corresponded to 25 or 50 cM (*cf.* Table S1-1). The number of selected individuals  $N_{sel}$  had no influence on  $N_S$ . The influence of the size of the breeding population  $N_{cand}$  was also relative small and a clear difference was only discernible for  $N_{chr} = 20$ . Here, the optimal  $N_S$  tended to be smaller with  $N_S = 2$  for  $N_{cand} = 30$  compared to  $N_S = 4$  for  $N_{cand} = 50$ . The optimal  $N_S$  was different if the goal was to maximize  $R_{OHV}$  in earlier selection cycles (Figure S1-1). Here, our results indicate that the optimal  $N_S$  increased with the number of cycles, whereas it decreased with  $N_{sel}$ . With completely dominant gene action,  $N_S$  tended to be

15 smaller for  $N_{cand} = 30$  by about a factor of two (Figure S1-2). For  $N_{cand} = 50$ , it was only smaller  
16 when  $N_{sel} = 10$ .

17 **Tables**

**Table S1-1:** Number of haplotypes ( $N_S$ ) per chromosome for selection criterion OHV. Bold face numbers indicate the optimal  $N_S$  maximizing genetic gain  $R_{OHV}$  after 50 cycles of recurrent selection for different values of  $N_{cand}$  and  $N_{sel}$ .

| $N_{chr}$ | $L$ | length (cM) |      |           |          |     |     |     |
|-----------|-----|-------------|------|-----------|----------|-----|-----|-----|
|           |     | 6.25        | 12.5 | 25        | 50       | 100 | 200 | 400 |
| 5         | 400 | 64          | 32   | <b>16</b> | <b>8</b> | 4   | 2   | 1   |
| 20        | 100 | 16          | 8    | <b>4</b>  | <b>2</b> | 1   | -   | -   |
| 40        | 50  | 8           | 4    | <b>2</b>  | <b>1</b> | -   | -   | -   |

$N_{chr}$ , number of chromosomes;  $L$ , chromosome length;  $N_{cand}$ , number of selection candidates;  $N_{sel}$ , number of selected individuals

18 **Figures**

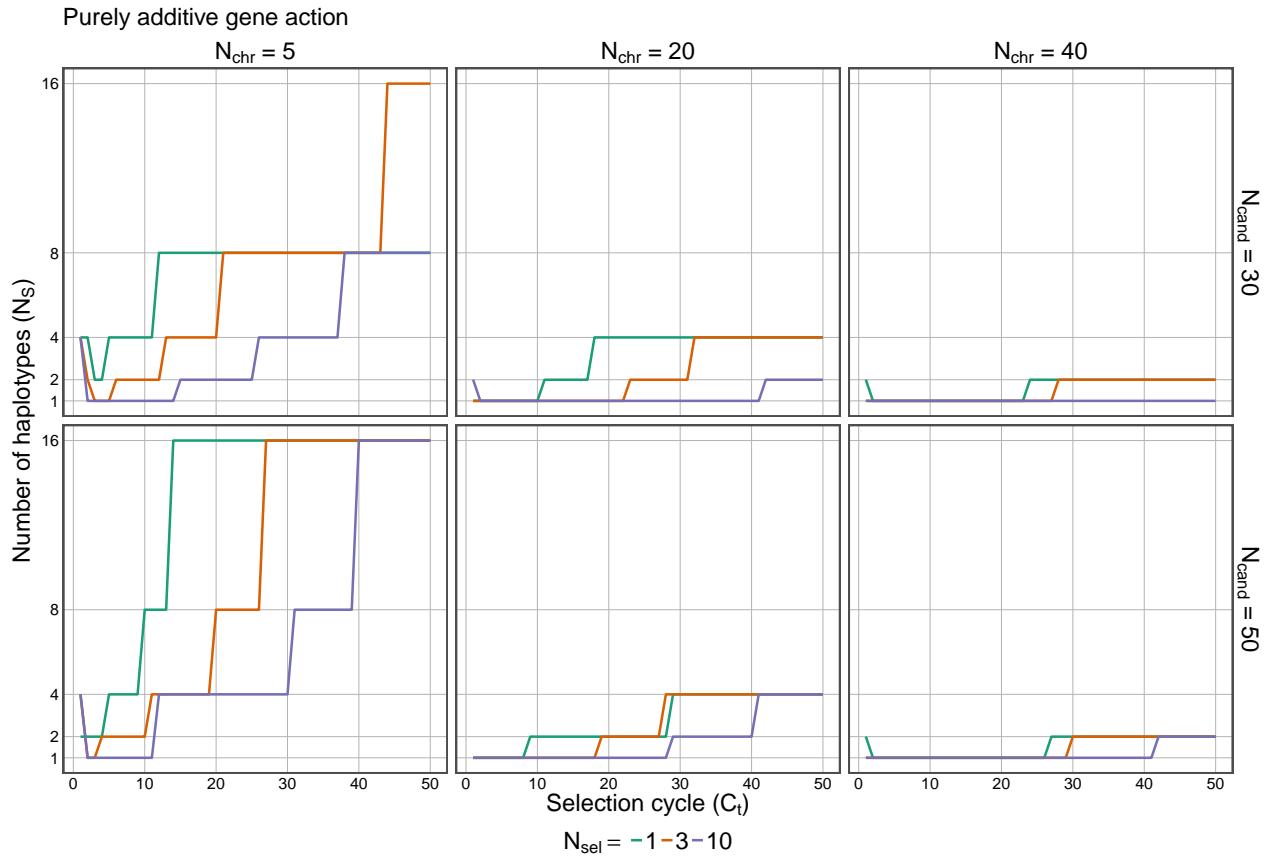

**Figure S1-1:** Number of haplotypes  $N_S$  per chromosome that maximize genetic gain ( $R_{OHV}$ ) in the respective selection cycle for scenario optimal haploid value (OHV) under purely additive gene action.  $N_{chr}$ , number of chromosomes;  $N_{cand}$ , number of selection candidates;  $N_{sel}$ , number of selected individuals.

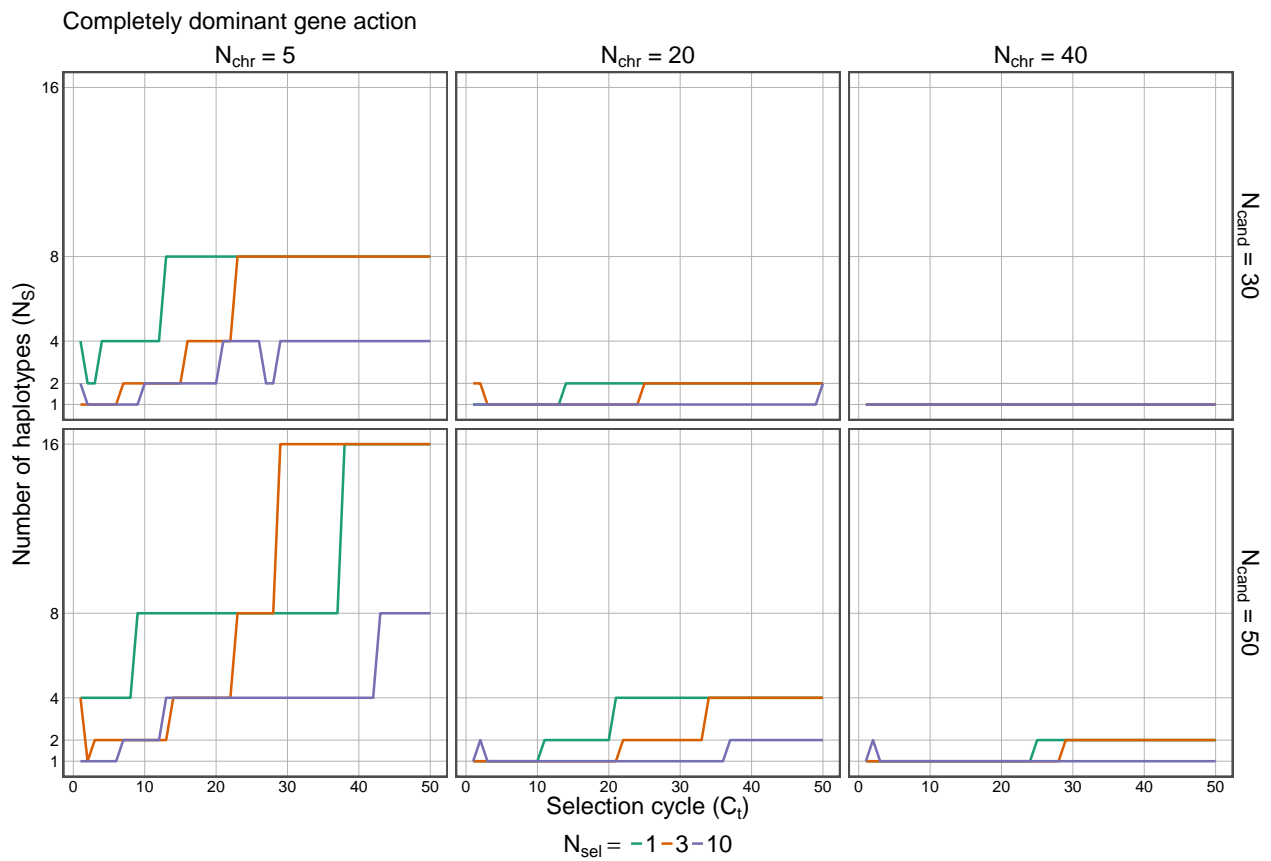

**Figure S1-2:** Number of haplotypes  $N_S$  per chromosome that maximize genetic gain ( $R_{OHV}$ ) in the respective selection cycle for scenario optimal haploid value (OHV) under completely dominant gene action.  $N_{chr}$ , number of chromosomes;  $N_{cand}$ , number of selection candidates;  $N_{sel}$ , number of selected individuals.

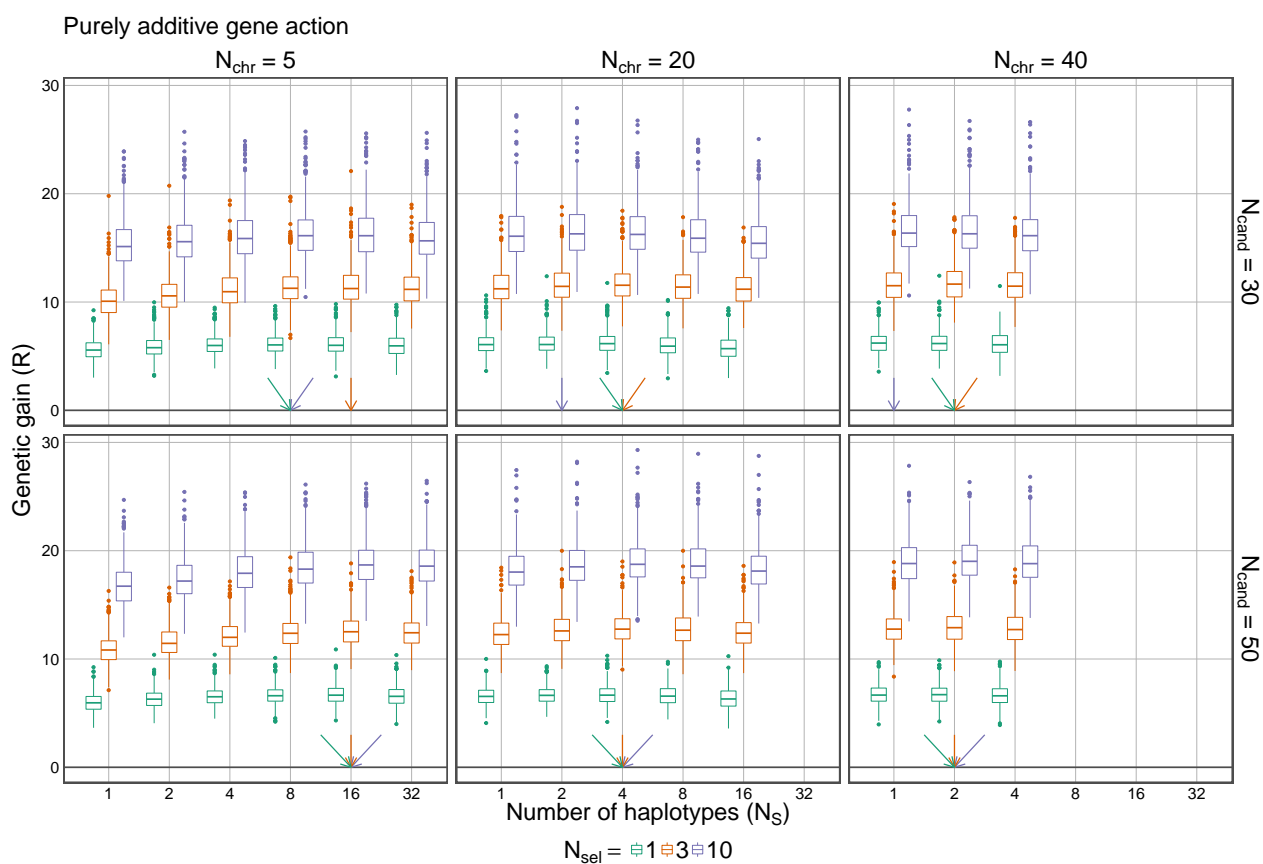

**Figure S1-3:** Boxplots of genetic gain ( $R_{OHV}$ ) for selection criterion optimal haploid value (OHV) in selection cycle 50 under purely additive gene action.  $N_{chr}$ , number of chromosomes;  $N_{cand}$ , number of selection candidates;  $N_{sel}$ , number of selected individuals;  $N_S$ , number of haplotypes per chromosome. Arrows indicate the optimal number of  $N_S$ .

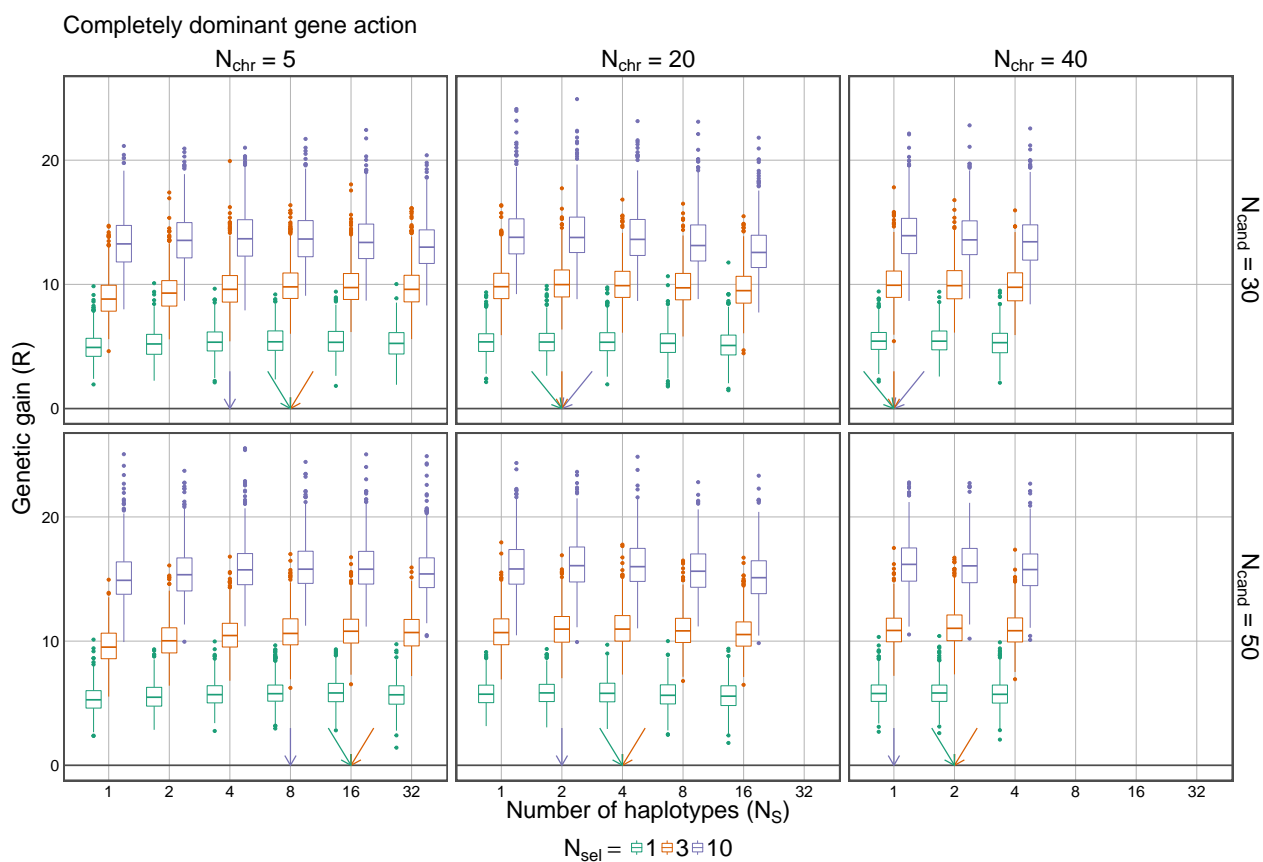

**Figure S1-4:** Boxplots of genetic gain ( $R_{OHV}$ ) for selection criterion optimal haploid value (OHV) in selection cycle 50 under completely dominant gene action.  $N_{chr}$ , number of chromosomes;  $N_{cand}$ , number of selection candidates;  $N_{sel}$ , number of selected individuals;  $N_S$ , number of haplotypes per chromosome. Arrows indicate the optimal number of  $N_S$ .
