# Supplementary material for: Selection on Expected Maximum Haploid Breeding Values Can Increase Genetic Gain in Recurrent Genomic Selection
Source: PubMed Central journal article supplement (PMC5873908; doi:10.1534/g3.118.200091), 2018-02-06
Supplement: 1173FileS3.pdf [file 1173FileS3.pdf]

# **Selection on expected maximum haploid breeding values can increase genetic gain in recurrent genomic selection**

Dominik Müller\*· Pascal Schopp\* <sup>and</sup> Albrecht E. Melchinger\*

\*Institute of Plant Breeding, Seed Sciences and Population Genetics, University of Hohenheim,  
70599 Stuttgart, Germany

January 28<sup>th</sup>, 2018

Correspondence: [melchinger@uni-hohenheim.de](mailto:melchinger@uni-hohenheim.de)

## **1 Supplemental Figures**

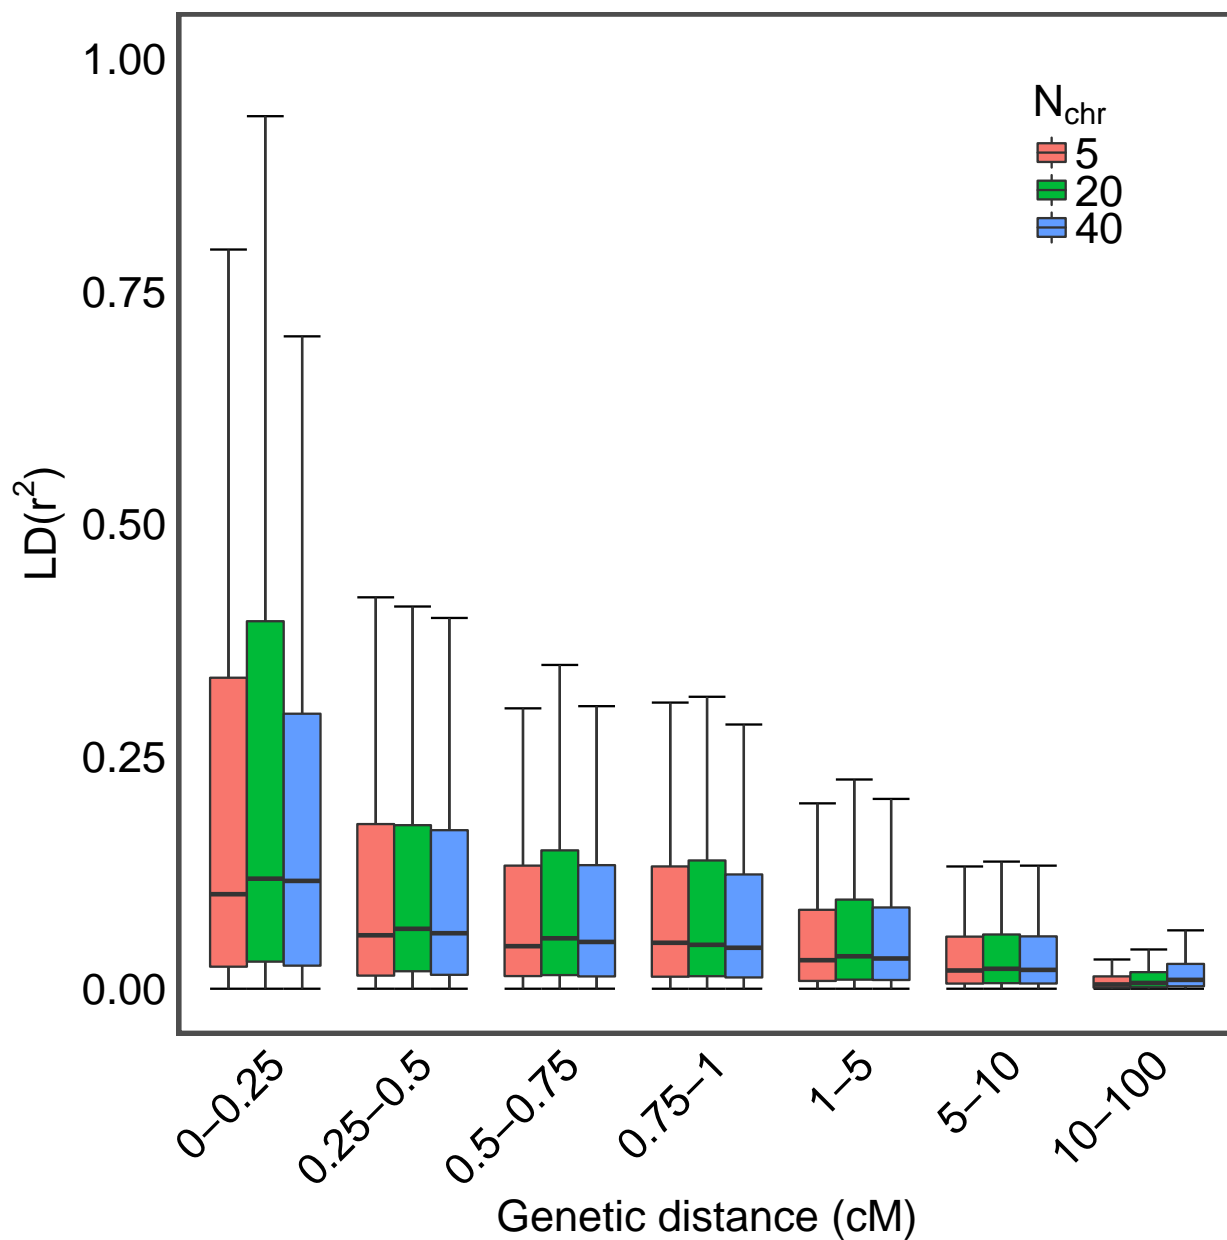

**Figure S1:** Distribution of pairwise linkage disequilibrium ( $r^2$ ) between loci over different genetic map distances and for different base populations.  $N_{chr}$ , number of chromosomes.

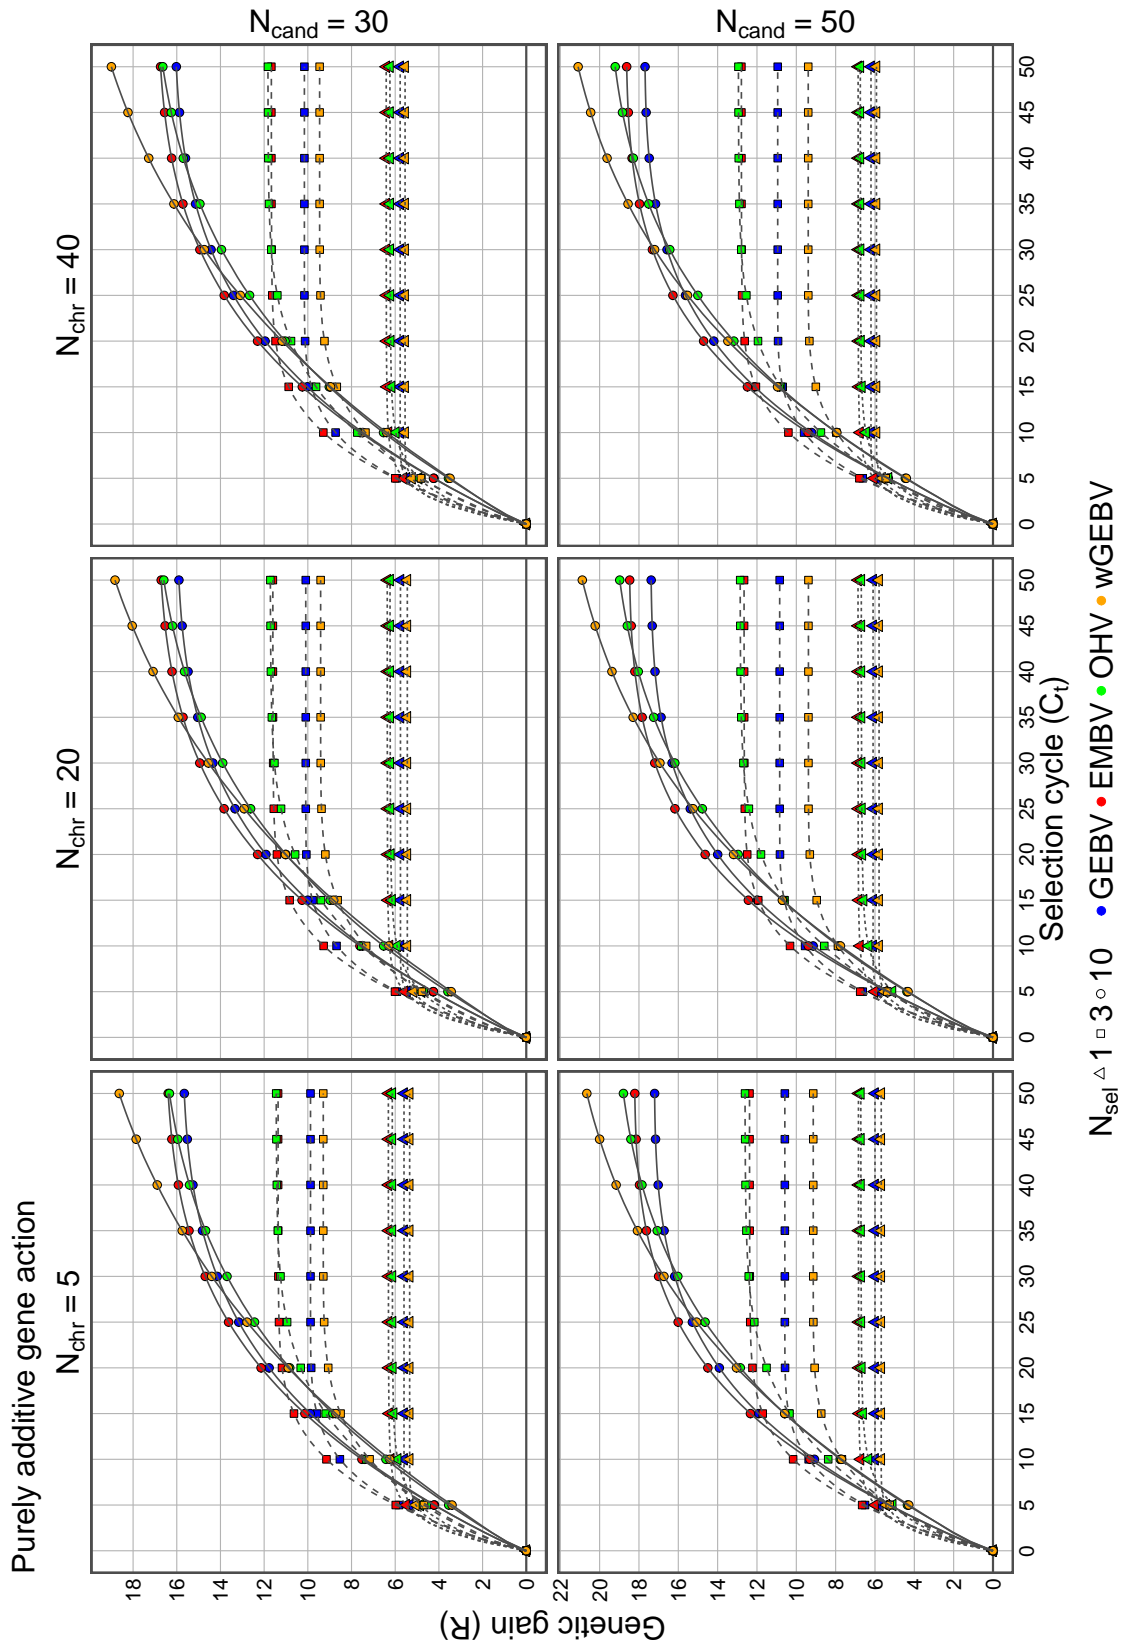

**Figure S2:** Genetic gain ( $R$ ) for selection criteria genomic-estimated breeding value (GEBV), expected maximum haploid breeding value (EMBv), optimal haploid value (OHV), and weighted GEBV (wGEBV) under recurrent selection and purely additive gene action.  $N_{chr}$ , number of chromosomes;  $N_{cand}$ , number of selection candidates;  $N_{sel}$ , number of selected individuals.

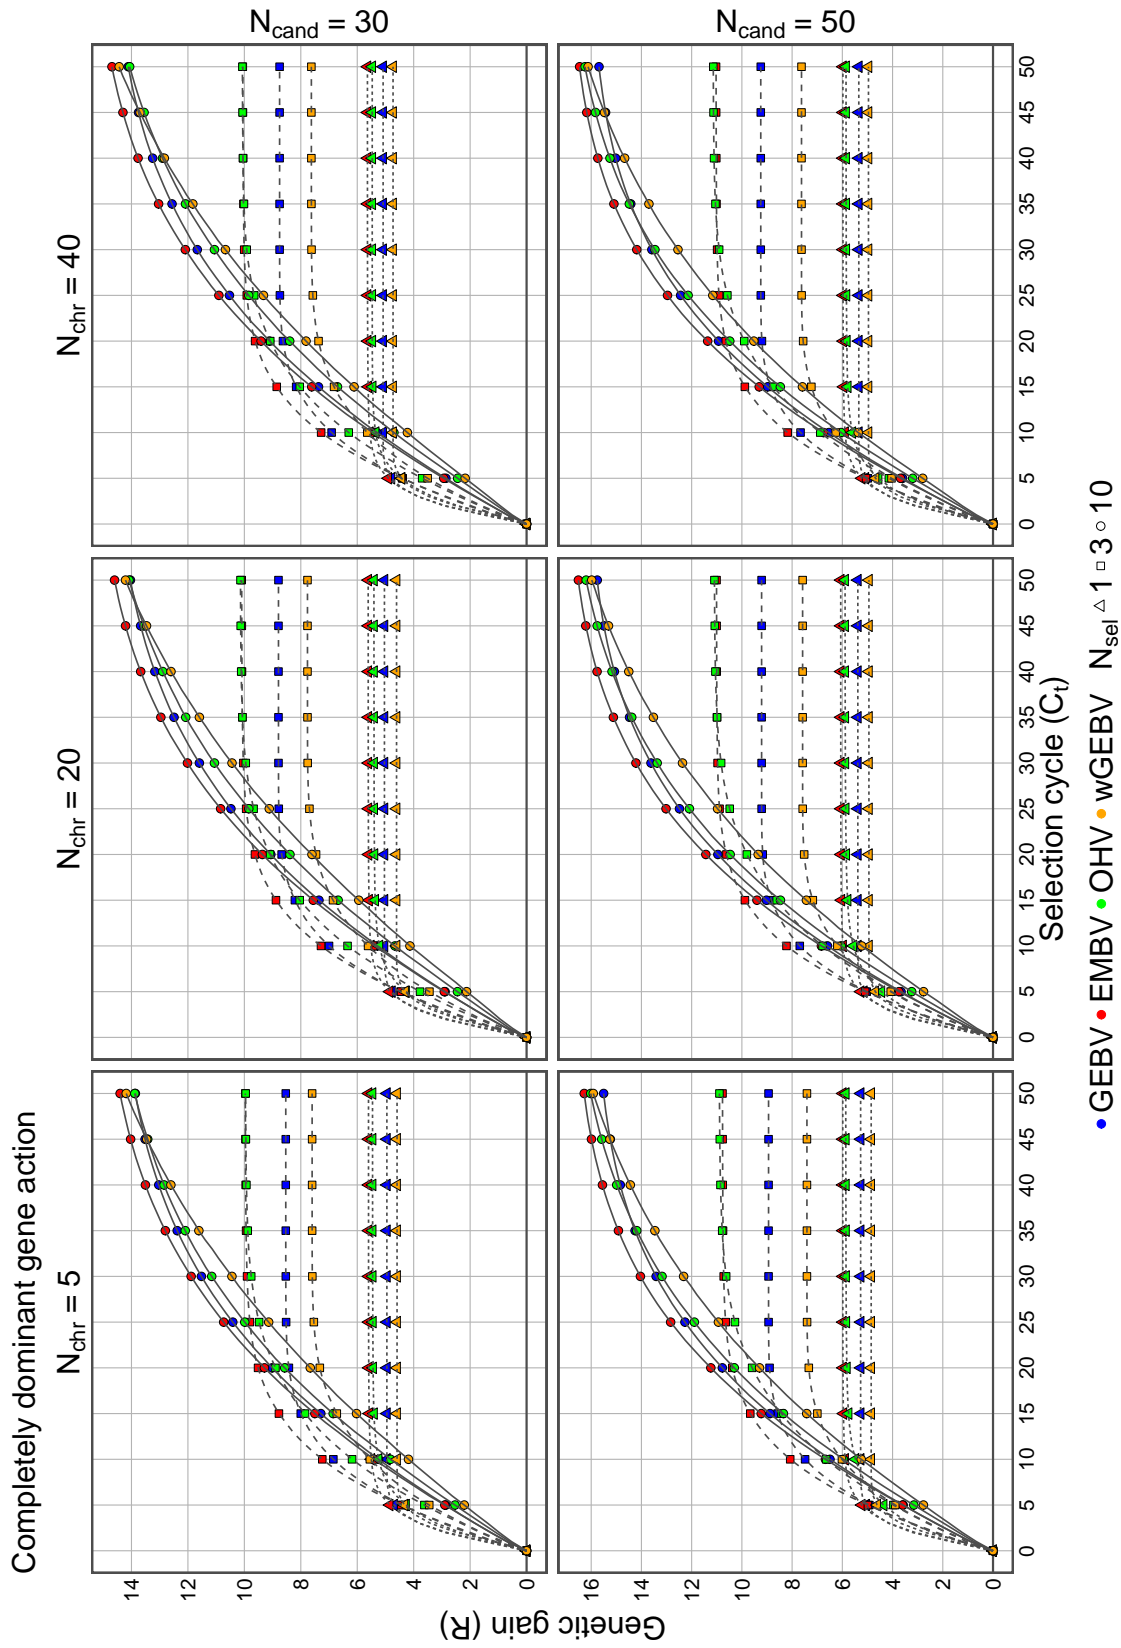

**Figure S3:** Genetic gain ( $R$ ) for selection criteria genomic-estimated breeding value (GEBV), expected maximum haploid breeding value (EMBV), optimal haploid value (OHV), and weighted GEBV (wGEBV) under recurrent selection and completely dominant gene action.  $N_{chr}$ , number of chromosomes;  $N_{cand}$ , number of selection candidates;  $N_{sel}$ , number of selected individuals.

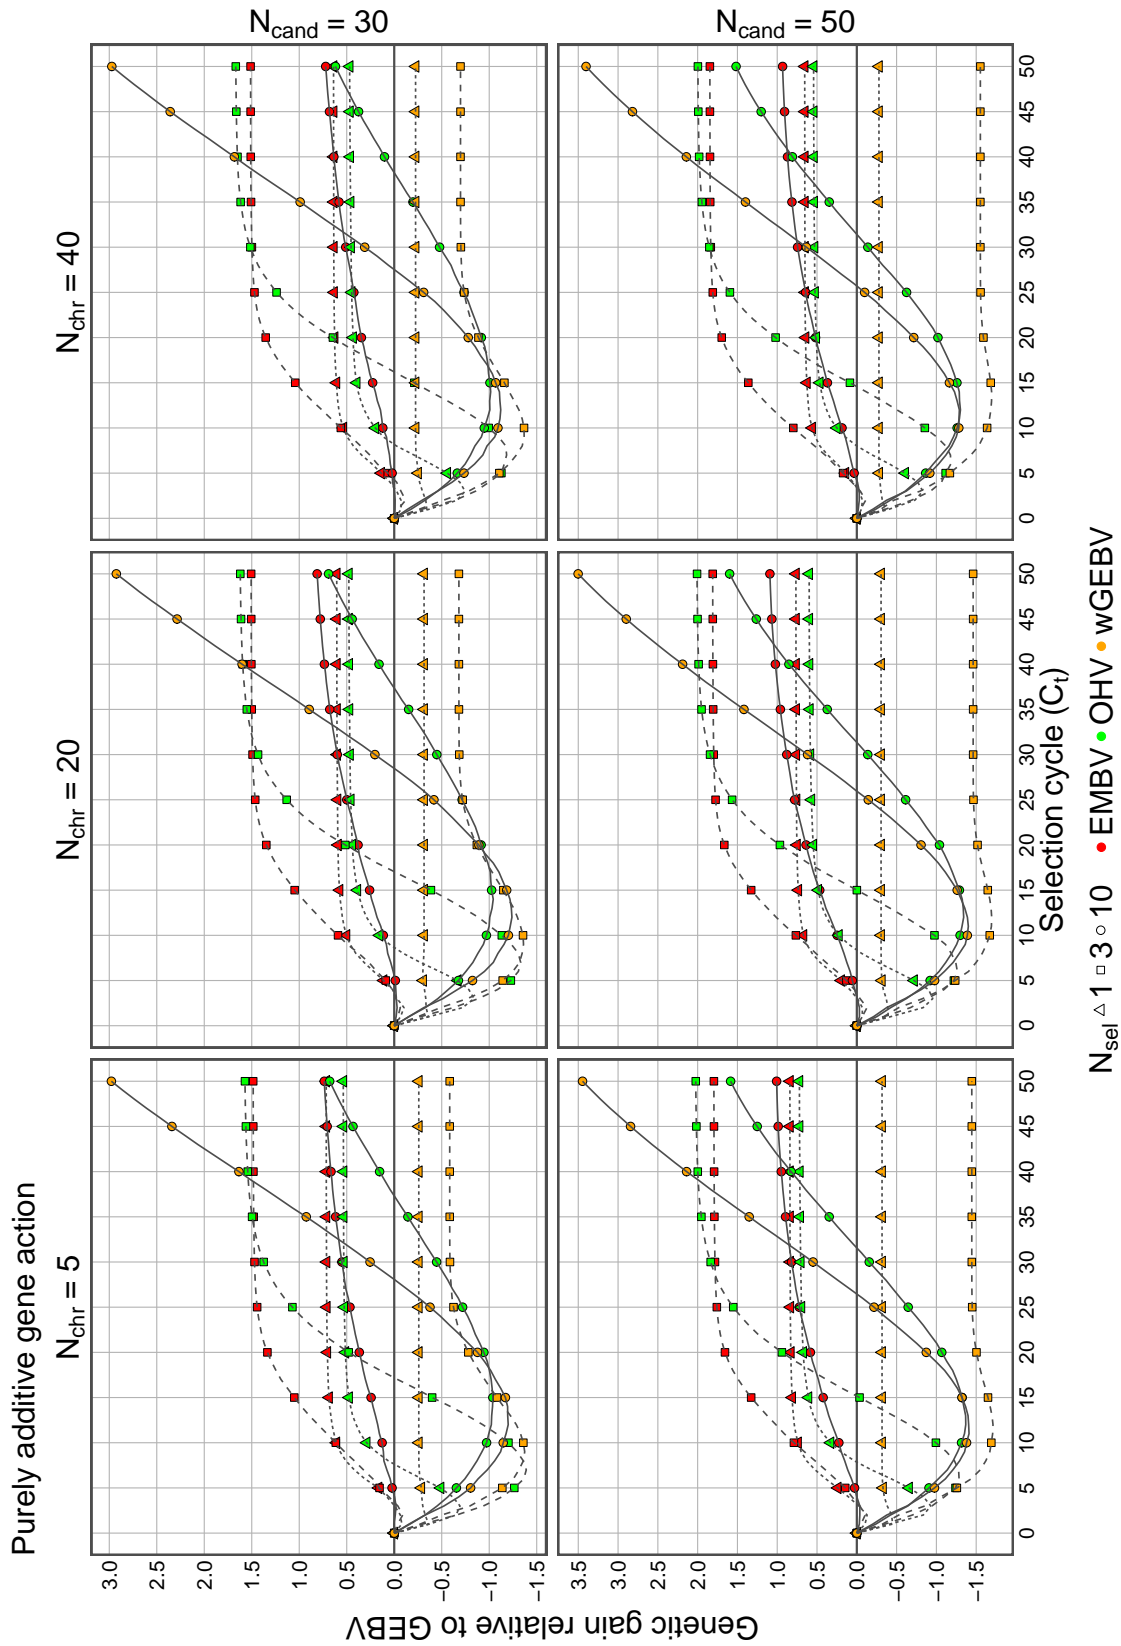

**Figure S4:** Difference in genetic gain ( $R$ ) between selection criteria expected maximum haploid breeding value (EMBV), optimal haploid value (OHV) and weighted genomic-estimated breeding values (wGEBV) relative to GBV under recurrent selection and purely additive gene action.  $N_{chr}$ , number of chromosomes;  $N_{cand}$ , number of selection candidates;  $N_{sel}$ , number of selected individuals.

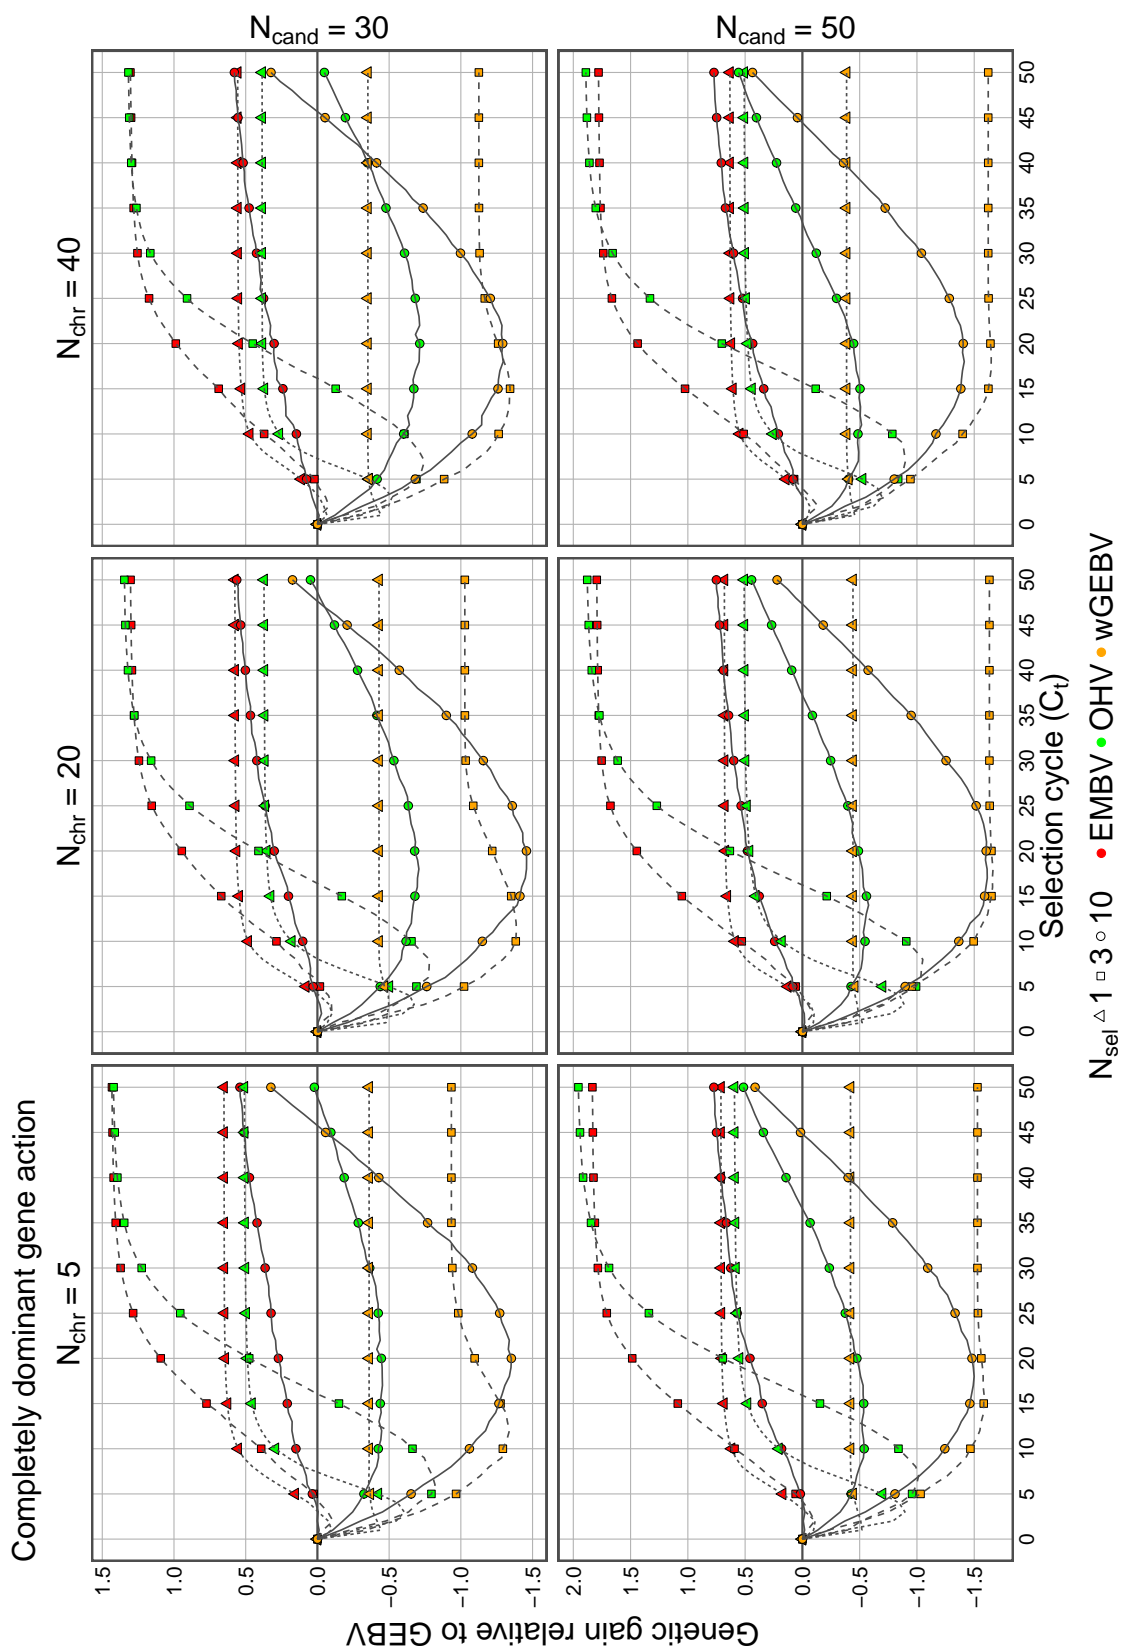

**Figure S5:** Difference in genetic gain ( $R$ ) between selection criteria expected maximum haploid breeding value (EMBV), optimal haploid value (OHV) and weighted genomic-estimated breeding values (wGEBV) relative to GBV under recurrent selection and completely dominant gene action.  $N_{chr}$ , number of chromosomes;  $N_{cand}$ , number of selection candidates;  $N_{sel}$ , number of selected individuals.

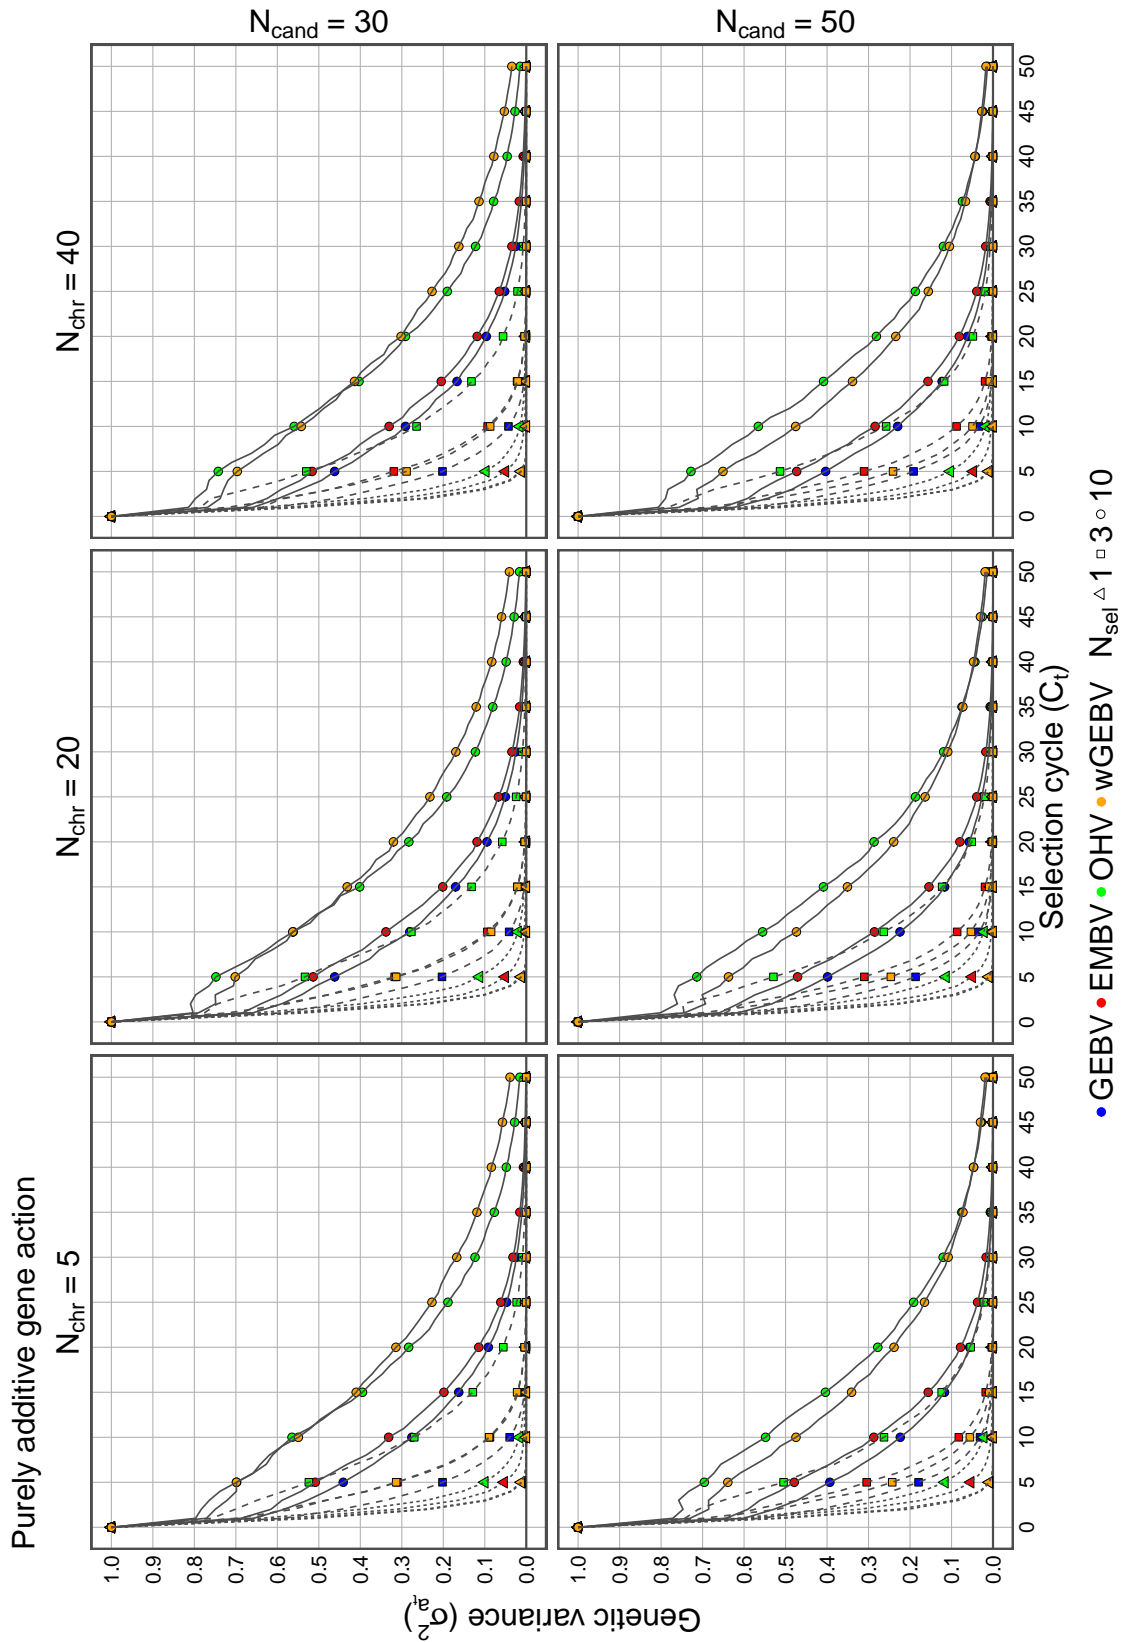

**Figure S6:** Additive-genetic variance ( $\sigma_{a_t}^2$ ) for selection criteria genomic-estimated breeding value (GEBV), expected maximum haploid breeding value (EMBV), optimal haploid value (OHV) and weighted GEBV (wGEBV) under recurrent selection and purely additive gene action.  $N_{chr}$ , number of chromosomes;  $N_{cand}$ , number of selection candidates;  $N_{sel}$ , number of selected individuals.

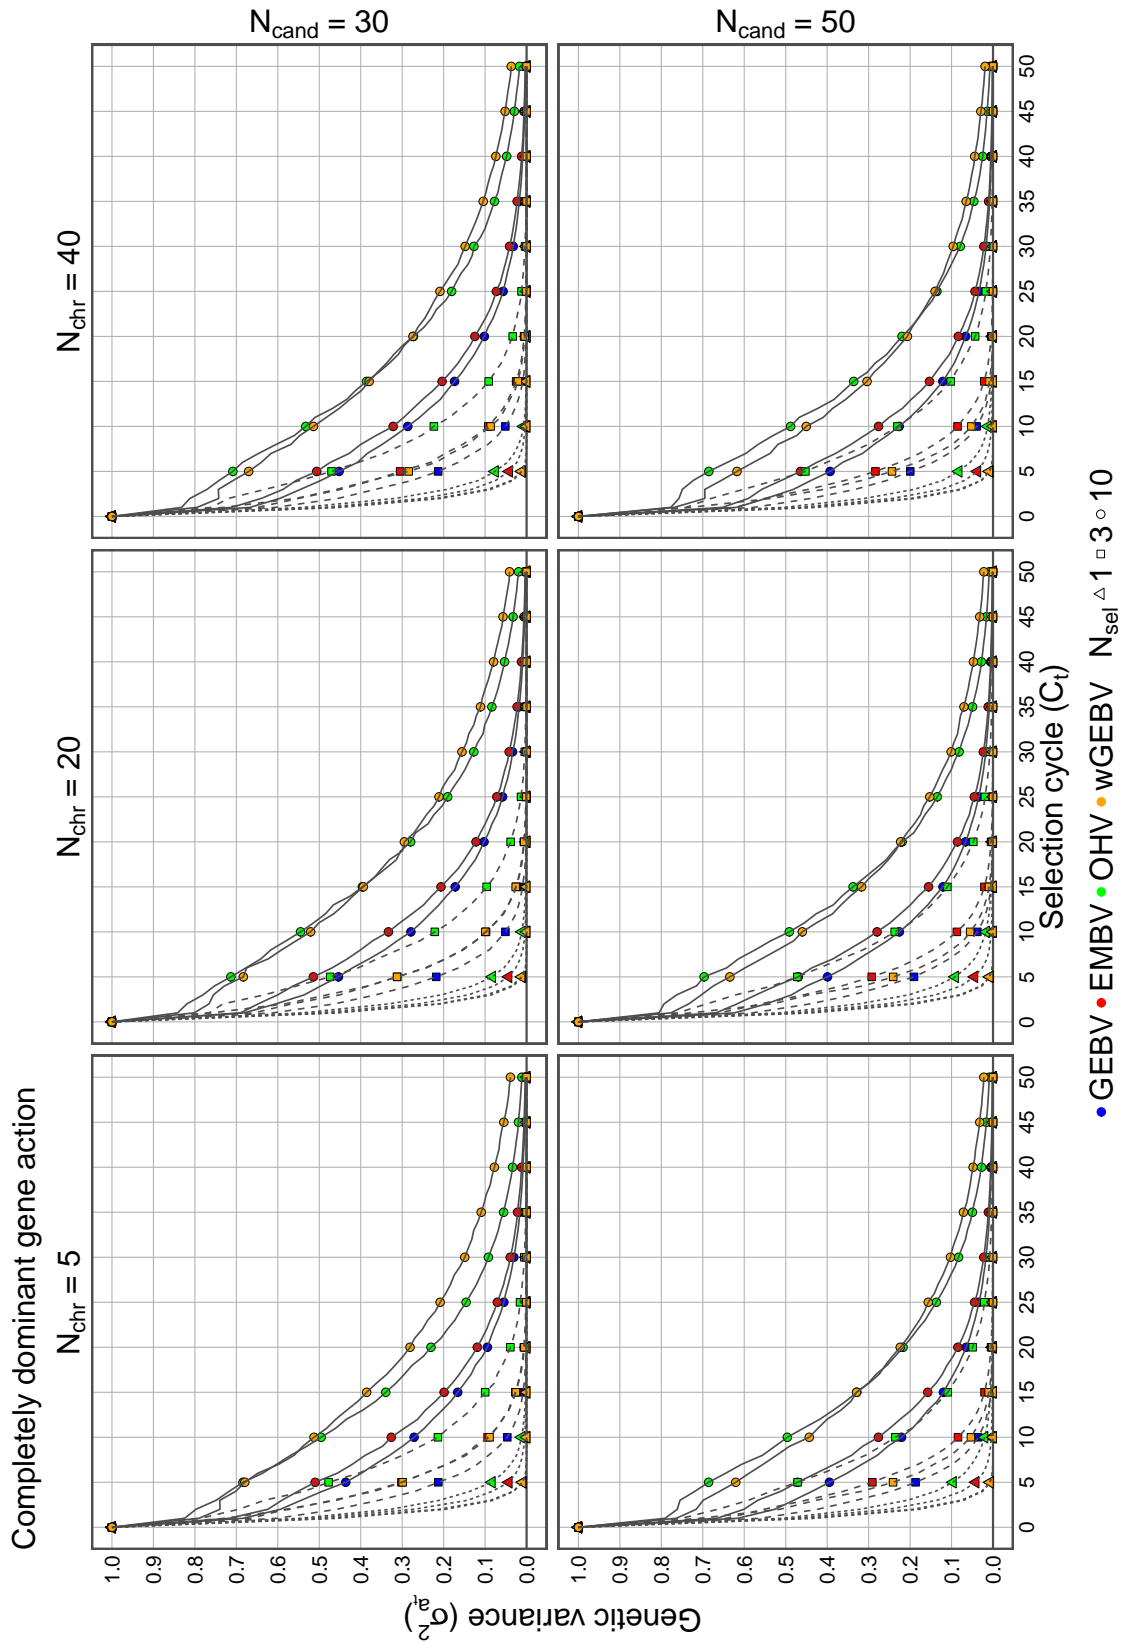

**Figure S7:** Additive-genetic variance ( $\sigma_{at}^2$ ) for selection criteria genomic-estimated breeding value (GEBV), expected maximum haploid breeding value (EMBV), optimal haploid value (OHV) and weighted GEBV (wGEBV) under recurrent selection and completely dominant gene action.  $N_{chr}$ , number of chromosomes;  $N_{cand}$ , number of selection candidates;  $N_{sel}$ , number of selected individuals.



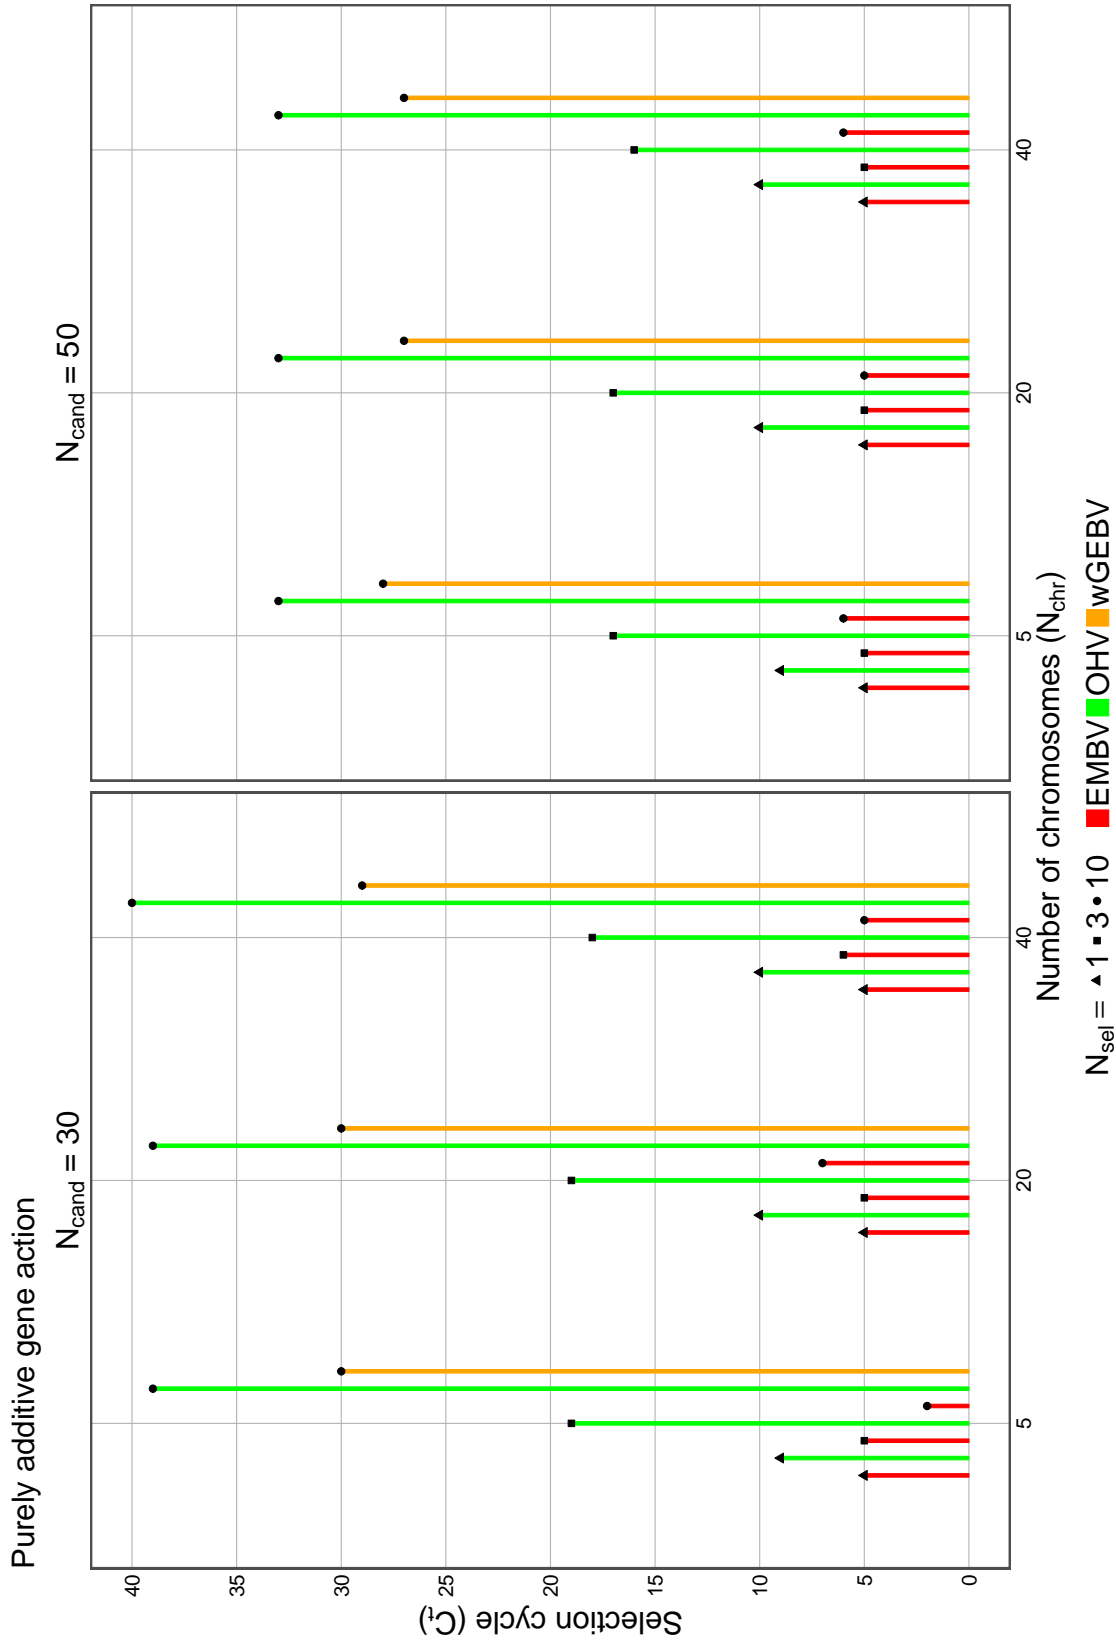

**Figure S8:** Selection cycle where genetic gain ( $R$ ) for selection criteria expected maximum haploid breeding value (EMB), optimal haploid value (OHV) and weighted genomic-estimated breeding value (wGEBV) surpassed selection criterion GEBV under purely additive gene action.  $N_{chr}$ , number of chromosomes;  $N_{cand}$ , number of selection candidates;  $N_{sel}$ , number of selected individuals.

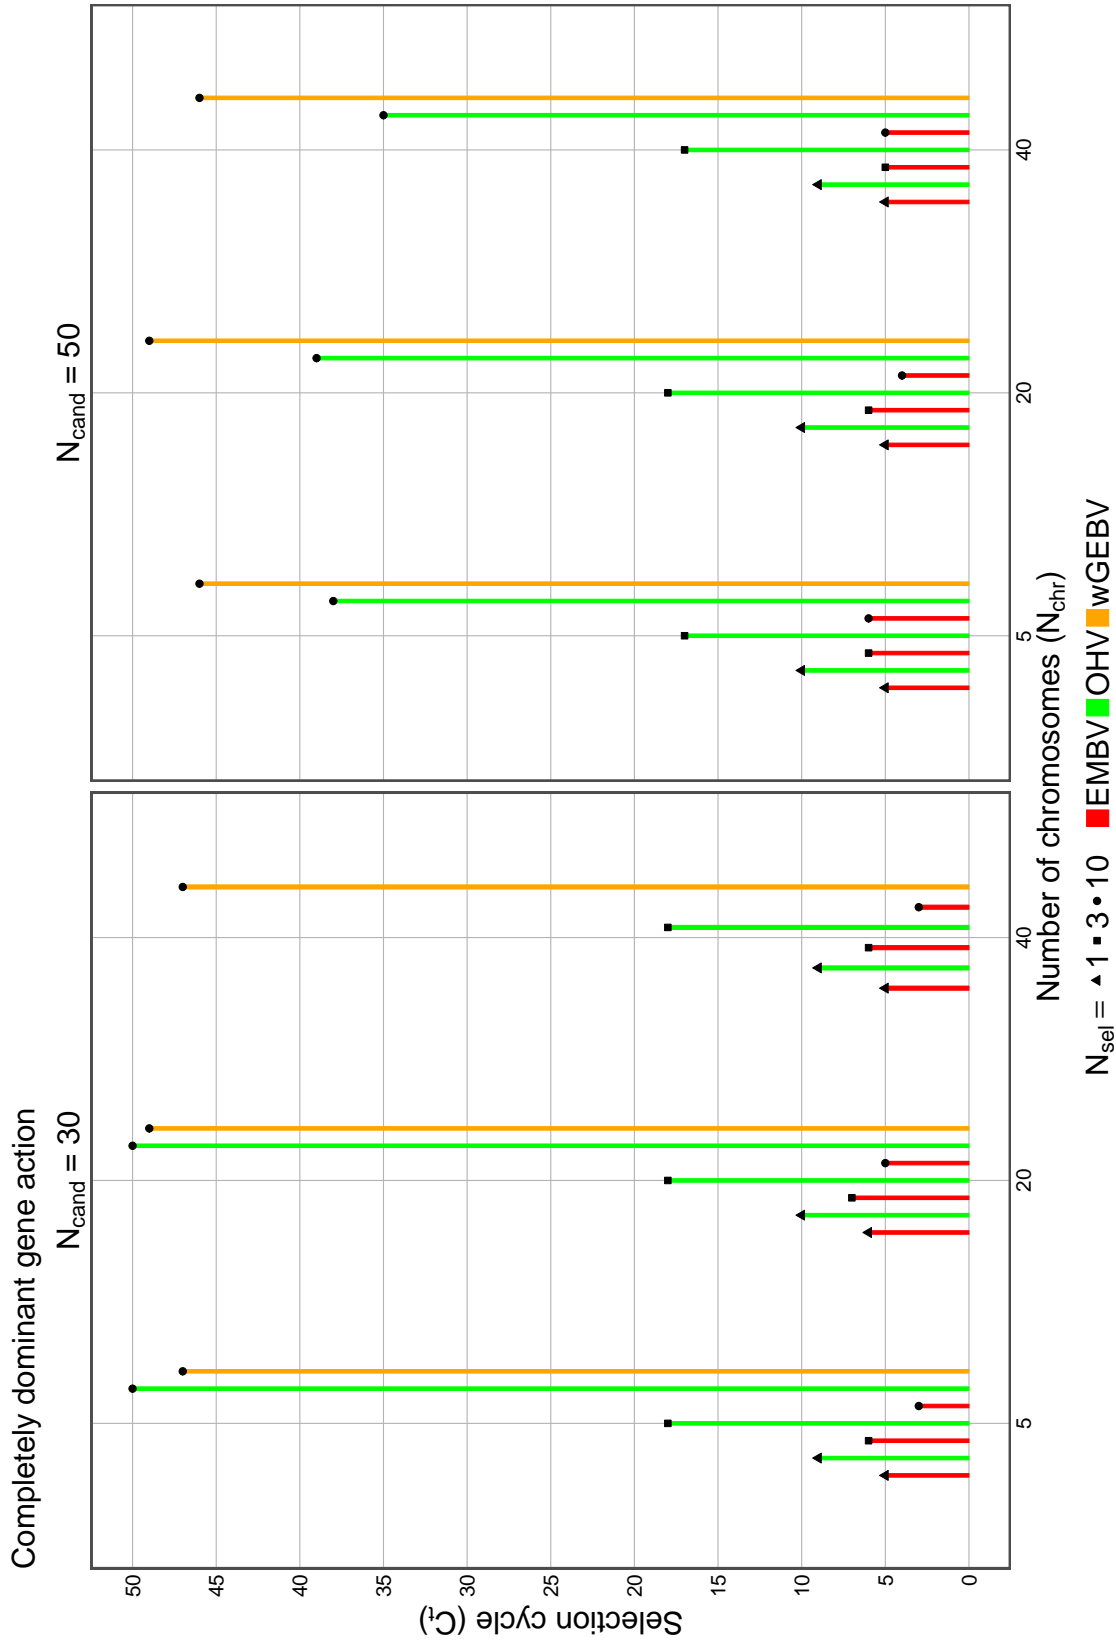

**Figure S9:** Selection cycle where genetic gain ( $R$ ) for selection criteria expected maximum haploid breeding value (EMBV), optimal haploid value (OHV) and weighted genomic-estimated breeding value (wGEBV) surpassed selection criterion GEBV under completely dominant gene action.  $N_{chr}$ , number of chromosomes;  $N_{cand}$ , number of selection candidates;  $N_{sel}$ , number of selected individuals.

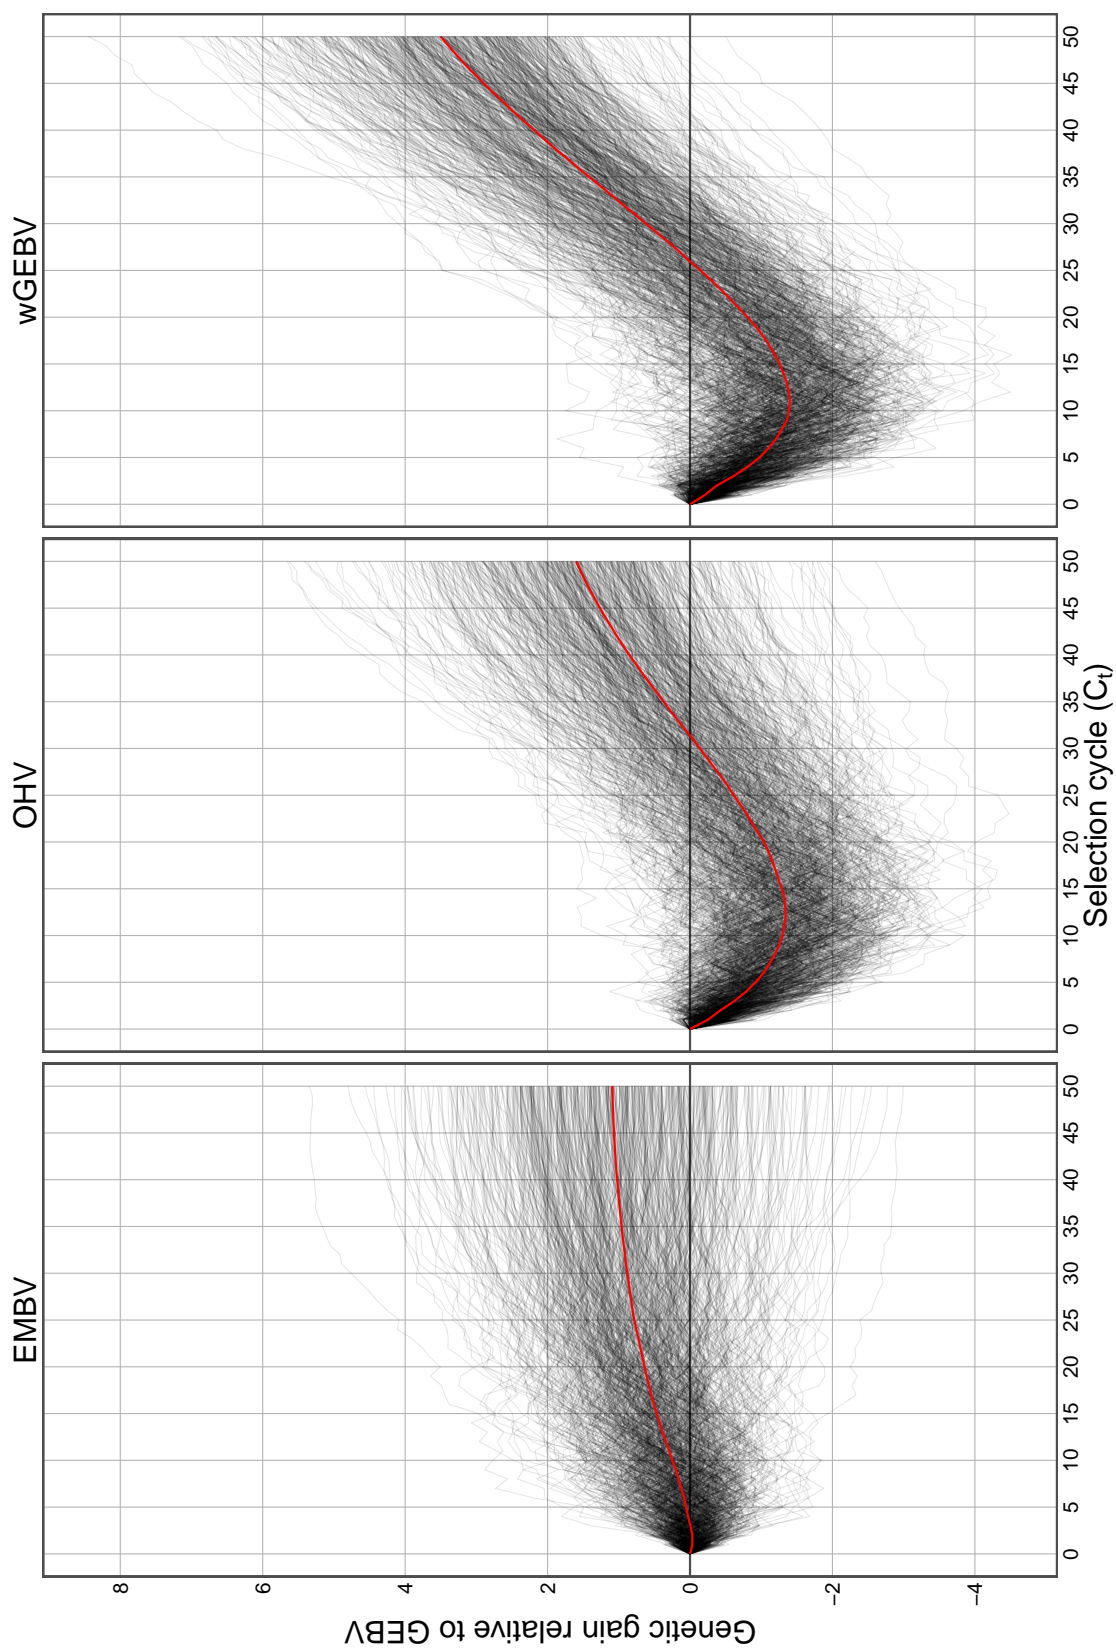

**Figure S10:** Trajectories of genetic gain ( $R$ ) for selection criteria expected maximum haploid breeding value (EMBV), optimal haploid value (OHV) and weighed genomic-estimated breeding value (wGEBV) relative to GEBV under recurrent selection and purely additive gene action. Trajectories are shown for  $N_{chr} = 20$ ,  $N_{cand} = 50$  and  $N_{sel} = 10$ .  $N_{chr}$ , number of chromosomes;  $N_{cand}$ , number of selection candidates;  $N_{sel}$ , number of selected individuals.
